# Supplementary material for: Ruthenium(II)-Arene Curcuminoid Complexes as Photosensitizer Agents for Antineoplastic and Antimicrobial Photodynamic Therapy: In Vitro and In Vivo Insights
Source: MDPI journal article supplement (doi:10.3390/molecules28227537), 2023-11-11
Supplement: s1 [file s1]

# **Supplementary Materials**

**Table S1.** IC<sub>50</sub> values obtained in HCT116 and HT29 cell lines following 24h treatment with **CUR**, **HCurc I** and **HCurc II**, 30 min irradiation with halogen white light lamp, 24h incubation in drug-free medium and MTT assay (mean ± E.S. of 3/5 independent experiments).

| IC <sub>50</sub> (mM) | HCT116     | HT29        |
|-----------------------|------------|-------------|
| <b>HCurc I</b>        | 1.06±0.23  | 1.59±0.27   |
| <b>1</b>              | 3,75±1,21  | 5,25±1,31   |
| <b>2</b>              | 15,76±1,85 | 3,58±0,61   |
| <b>3</b>              | 4,11±0,81  | 5,80±1,15   |
| <b>HCurc II</b>       | 1.91±0.14  | 3.36±0.74   |
| <b>4</b>              | 6,97±1,36  | 10,610±1,51 |
| <b>5</b>              | 6,62±1,51  | 8,154±1,53  |
| <b>6</b>              | 10,03±0,89 | 10,651±1,15 |

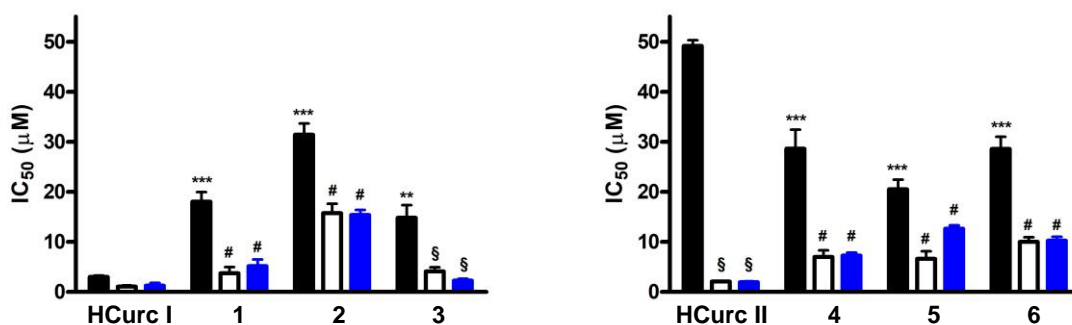

**Figure S1.** IC<sub>50</sub> values obtained in HCT116 cells following 24 h treatment with the studied compounds, 30 min irradiation under blue LED or white halogen lamp, 24 h incubation in drug-free medium and MTT assay (mean ± ES 3/4 independent experiments; \*\*\* p<0.001 vs HCurc@ same condition; # p<0.01 vs HCurc@ same condition and dark; \*\* p<0.01 vs HCurc@ and 2 same condition; § p<0.001 vs dark)

**Table S2.** Phototoxic index of **HCurc I**, **HCurc II** and their arene-Ru(II) derivatives in HCT116 E6 cells.

| <b>HCurc I</b> | <b>1</b> | <b>2</b> | <b>3</b> | <b>HCurc II</b> | <b>4</b> | <b>5</b> | <b>6</b> |
|----------------|----------|----------|----------|-----------------|----------|----------|----------|
| 6.6            | 10.32    | 31.9     | 8.6      | 46.81           | 5.6      | 19.51    | 4.1      |

**Table S3.** Effects of **HCurc I, 1, 2 and 3** on Gm survival. d: days after treatment; C: control (PBS injection); D subscript: dark condition; L subscript: after PDT. (means  $\pm$ SD of four independent assays).

| HCurc I and derivatives |                                                  |             |               |             |             |             |             |             |             |
|-------------------------|--------------------------------------------------|-------------|---------------|-------------|-------------|-------------|-------------|-------------|-------------|
| d                       | % survival <i>G. mellonella</i> (means $\pm$ SD) |             |               |             |             |             |             |             |             |
|                         | C                                                | HCurc Id    | HCurc IL      | 1D          | 1L          | 2D          | 2L          | 3D          | 3L          |
| 1                       | 100 $\pm$ 0                                      | 80 $\pm$ 0  | 50 $\pm$ 11.5 | 100 $\pm$ 0 | 100 $\pm$ 0 | 100 $\pm$ 0 | 95 $\pm$ 10 | 100 $\pm$ 0 | 100 $\pm$ 0 |
| 3                       | 100 $\pm$ 0                                      | 80 $\pm$ 0  | 45 $\pm$ 10   | 95 $\pm$ 10 | 100 $\pm$ 0 | 90 $\pm$ 20 | 95 $\pm$ 10 | 95 $\pm$ 10 | 100 $\pm$ 0 |
| 5                       | 100 $\pm$ 0                                      | 80 $\pm$ 0  | 40 $\pm$ 0    | 95 $\pm$ 10 | 100 $\pm$ 0 | 90 $\pm$ 20 | 95 $\pm$ 10 | 95 $\pm$ 10 | 100 $\pm$ 0 |
| 7                       | 100 $\pm$ 0                                      | 75 $\pm$ 10 | 25 $\pm$ 10   | 95 $\pm$ 10 | 100 $\pm$ 0 | 90 $\pm$ 20 | 95 $\pm$ 10 | 95 $\pm$ 10 | 100 $\pm$ 0 |

**Table S4.** Effects of **HCurc II, 4, 5 and 6** on Gm survival. d: days after treatment; C: control (PBS injection); D subscript: dark condition; L subscript: after PDT. (means  $\pm$ SD of four independent assays).

| HCurc II and derivatives |                                                  |                       |                       |                |                |                |                |                |                |
|--------------------------|--------------------------------------------------|-----------------------|-----------------------|----------------|----------------|----------------|----------------|----------------|----------------|
| d                        | % survival <i>G. mellonella</i> (means $\pm$ SD) |                       |                       |                |                |                |                |                |                |
|                          | C                                                | HCurc II <sub>D</sub> | HCurc II <sub>L</sub> | 4 <sub>D</sub> | 4 <sub>L</sub> | 5 <sub>D</sub> | 5 <sub>L</sub> | 6 <sub>D</sub> | 6 <sub>L</sub> |
| 1                        | 100 $\pm$ 0                                      | 95 $\pm$ 10           | 75 $\pm$ 10           | 100 $\pm$ 0    | 95 $\pm$ 10    | 100 $\pm$ 0    | 100 $\pm$ 0    | 95 $\pm$ 10    | 100 $\pm$ 0    |
| 3                        | 100 $\pm$ 0                                      | 85 $\pm$ 10           | 45 $\pm$ 10           | 100 $\pm$ 0    | 90 $\pm$ 11.5  | 100 $\pm$ 0    | 100 $\pm$ 0    | 95 $\pm$ 10    | 100 $\pm$ 0    |
| 5                        | 100 $\pm$ 0                                      | 80 $\pm$ 0            | 30 $\pm$ 11.5         | 100 $\pm$ 0    | 85 $\pm$ 19.1  | 100 $\pm$ 0    | 100 $\pm$ 0    | 95 $\pm$ 10    | 100 $\pm$ 0    |
| 7                        | 100 $\pm$ 0                                      | 75 $\pm$ 10           | 0                     | 100 $\pm$ 0    | 85 $\pm$ 19.1  | 100 $\pm$ 0    | 100 $\pm$ 0    | 95 $\pm$ 10    | 100 $\pm$ 0    |
